# Supplementary material for: Effect of Application Rates of N and P Fertilizers on Soil Nematode Community Structure in Mollisols
Source: MDPI journal article supplement (doi:10.3390/agronomy14030507), 2024-02-29
Supplement: s1 [file s1]

**Table S1.** Nematode functional guilds under different rates of N and P fertilizers.

|     | N and P fertilizers |            |            |             |             |             | <i>p</i> -value |              |
|-----|---------------------|------------|------------|-------------|-------------|-------------|-----------------|--------------|
|     | N0P0                | N1P1       | N2P1       | N3P1        | N1P2        | N1P3        | N fertilizer    | P fertilizer |
| Pp2 | 21.1 ± 5.9          | 16.9 ± 7.5 | 10.2 ± 4.4 | 7.4 ± 2.3   | 26.3 ± 6.5  | 18.3 ± 2.4  | 0.193           | 0.594        |
| Pp3 | 0.0 ± 0.0           | 0.0 ± 0.0  | 0.0 ± 0.0  | 0.5 ± 0.5   | 0.5 ± 0.5   | 0.5 ± 0.5   | 0.392           | 0.532        |
| Pp4 | 0.0 ± 0.0           | 0.5 ± 0.5  | 0.0 ± 0.0  | 0.0 ± 0.0   | 0.0 ± 0.0   | 0.0 ± 0.0   | 0.392           | 0.392        |
| Pp5 | 0.0 ± 0.0           | 1.4 ± 0.8  | 0.5 ± 0.5  | 0.0 ± 0.0   | 0.5 ± 0.5   | 0.0 ± 0.0   | 0.172           | 0.196        |
| Ba1 | 3.8 ± 0.5           | 8.5 ± 2.4  | 31.0 ± 4.1 | 22.7 ± 6.4  | 10.3 ± 3.3  | 13.6 ± 5.4  | 0.032           | 0.159        |
| Ba2 | 14.1 ± 4.3          | 16.9 ± 2.8 | 24.5 ± 6.1 | 44.9 ± 11.7 | 18.3 ± 5.3  | 26.8 ± 2.2  | 0.099           | 0.172        |
| Ba3 | 0.9 ± 0.5           | 2.8 ± 0.8  | 2.3 ± 1.2  | 8.8 ± 3.2   | 6.1 ± 0.5   | 2.8 ± 0.8   | 0.135           | 0.037        |
| Ba4 | 0.0 ± 0.0           | 0.0 ± 0.0  | 0.9 ± 0.5  | 0.5 ± 0.5   | 0.9 ± 0.5   | 0.0 ± 0.0   | 0.214           | 0.086        |
| Fu2 | 18.3 ± 3.7          | 30.0 ± 4.5 | 25.0 ± 8.9 | 49.1 ± 6.7  | 40.4 ± 14.4 | 91.1 ± 11.0 | 0.063           | 0.043        |
| Fu4 | 40.8 ± 7.3          | 34.3 ± 6.3 | 13.9 ± 2.1 | 19.4 ± 10.4 | 14.6 ± 4.8  | 13.6 ± 6.0  | 0.113           | 0.045        |

|     |                |               |                |               |               |               |       |       |
|-----|----------------|---------------|----------------|---------------|---------------|---------------|-------|-------|
| Om4 | $14.1 \pm 3.5$ | $9.4 \pm 0.5$ | $10.2 \pm 2.0$ | $5.1 \pm 2.8$ | $4.2 \pm 1.6$ | $3.3 \pm 0.5$ | 0.110 | 0.027 |
| Pr3 | $0.5 \pm 0.5$  | $0.0 \pm 0.0$ | $0.0 \pm 0.0$  | $0.0 \pm 0.0$ | $0.0 \pm 0.0$ | $0.0 \pm 0.0$ | 0.392 | 0.392 |
| Pr4 | $0.0 \pm 0.0$  | $0.0 \pm 0.0$ | $1.4 \pm 1.4$  | $0.0 \pm 0.0$ | $0.5 \pm 0.5$ | $0.0 \pm 0.0$ | 0.392 | 0.392 |
| Pr5 | $7.5 \pm 1.2$  | $7.0 \pm 2.2$ | $1.9 \pm 1.2$  | $4.2 \pm 1.6$ | $4.2 \pm 2.2$ | $2.3 \pm 0.5$ | 0.086 | 0.130 |

---

Note: Pp, plant parasites; Ba, bacterivores; Fu, fungivores; Om, omnivores; and Pr, predators. The number following the abbreviations is nematode *c-p* value. The rates of N and P fertilizers are denoted as N0P0, N1P1, N2P1, N3P1, N1P2, and N1P3.

**Table S2.** Soil properties under different rates of N and P fertilizers.

|                 | TN<br>g/kg | TC<br>g/kg | C/N   | NO <sub>3</sub> <sup>-</sup> -N<br>mg/kg | NH <sub>4</sub> <sup>+</sup> -N<br>mg/kg | TP<br>g/kg | AP<br>mg/kg | TK<br>g/kg | AK<br>mg/kg | WT    | pH    |
|-----------------|------------|------------|-------|------------------------------------------|------------------------------------------|------------|-------------|------------|-------------|-------|-------|
| N0P0            | 1.82       | 24.23      | 13.30 | 7.33                                     | 7.13                                     | 0.44       | 34.19       | 22.00      | 153.33      | 0.29  | 5.68  |
| N1P1            | 1.83       | 24.48      | 13.37 | 7.36                                     | 7.23                                     | 0.54       | 47.16       | 22.60      | 159.33      | 0.29  | 5.82  |
| N2P1            | 1.86       | 24.85      | 13.34 | 7.42                                     | 7.89                                     | 0.50       | 45.47       | 22.13      | 167.00      | 0.28  | 5.65  |
| N3P1            | 1.86       | 24.68      | 13.26 | 8.10                                     | 8.98                                     | 0.47       | 39.31       | 24.00      | 154.00      | 0.28  | 5.60  |
| N1P2            | 1.87       | 25.28      | 13.50 | 9.90                                     | 9.24                                     | 0.62       | 76.95       | 24.20      | 193.00      | 0.29  | 6.00  |
| N1P3            | 1.86       | 25.16      | 13.51 | 10.14                                    | 10.99                                    | 0.67       | 89.64       | 24.47      | 162.67      | 0.29  | 5.83  |
| <i>p</i> -value | 0.861      | 0.773      | 0.829 | 0.377                                    | 0.046                                    | 0.018      | 0.012       | 0.017      | 0.857       | 0.948 | 0.011 |

Note: TN, total nitrogen; TC, soil total carbon; C/N, ratio of soil organic carbon to total nitrogen; NH<sub>4</sub><sup>+</sup>-N, ammonium-nitrogen; NO<sub>3</sub><sup>-</sup>-N, nitrate nitrogen; TK, total potassium; AK; available potassium; TP, total phosphorus; AP, available phosphorus, WT, soil water content; and pH, soil pH. The rates of N and P fertilizers are denoted as N0P0, N1P1, N2P1, N3P1, N1P2, and N1P3.
